# Supplementary material
Source: PubMed Central journal article supplement (PMC5116719)
Supplement: IAI.00755-16_zii999091890so1.pdf [file IAI.00755-16_zii999091890so1.pdf]

## Supplementary Information

Supplementary Table 1: Data collection and refinement statistics for crystallography

|                                 |                          |
|---------------------------------|--------------------------|
| <b>Data collection</b>          |                          |
| Wavelength (Å)                  | 1.00                     |
| Resolution range (Å)            | 89.14-3.15 (3.37 – 3.15) |
| Space group                     | P 6 <sub>4</sub> 2 2     |
| Unit cell (Å)                   | 84.85 x 84.85 x 178.27   |
| Unit cell (°)                   | 90 × 90 × 120            |
| Unique reflections (Total)      | 7129 (91460)             |
| Multiplicity                    | 12.8 (13.1)              |
| Completeness (%)                | 100.00 (100.00)          |
| Mean I/sigma (I/σ)              | 12.9 (2.1)               |
| R <sub>sym</sub> <sup>#</sup>   | 0.052 (0.712)            |
| <b>Refinement</b>               |                          |
| R <sub>work</sub> <sup>++</sup> | 0.2755 (0.3508)          |
| R <sub>free</sub>               | 0.3260 (0.3619)          |
| No. of atoms                    | 1874                     |
| No. of hemes                    | 2                        |
| No. of waters                   | 0                        |
| No. of protein residues         | 215                      |
| R.m.s.d., bonds (Å)             | 0.004                    |
| R.m.s.d., angles (°)            | 0.98                     |
| Ramachandran favored (%)        | 96                       |
| Ramachandran outliers (%)       | 0                        |
| B-factor (Å <sup>2</sup> )      |                          |
| Average                         | 111.6                    |
| Macromolecules                  | 112.1                    |
| Ligands                         | 100.7                    |
| PDB code                        | 4YMP                     |

Statistics for the highest-resolution shell are shown in parentheses.

$$^{\#}R_{\text{sym}} = \frac{\sum \sum_i |I_i - \langle I \rangle|}{\sum \sum_i I_i}$$

<sup>++</sup>R<sub>work</sub> =  $\frac{\sum ||F_{\text{obs}}| - |F_{\text{calc}}||}{\sum |F_{\text{obs}}|}$ , where R<sub>free</sub> was computed identically except all reflections belonged to a test set consisting of a 5% random selection of the data.

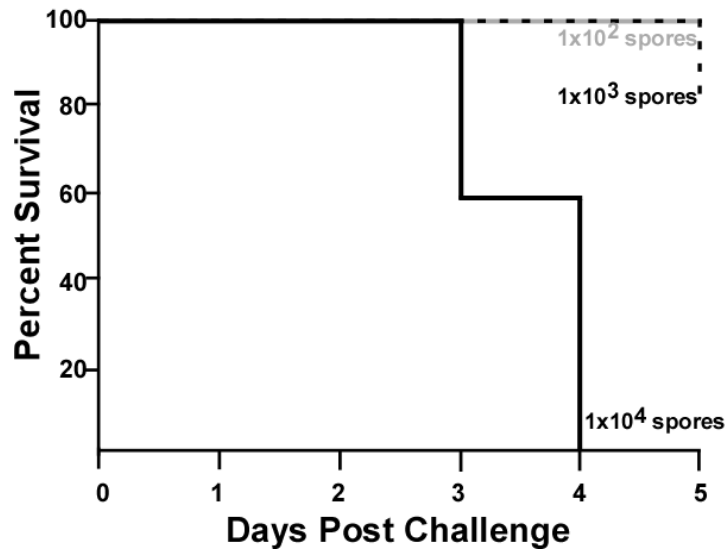

**Supplementary Figure 1. Measurement of the LD<sub>50</sub> of *B. anthracis* Sterne for A/J mice.**

Three groups of mice (n = 5) were subcutaneously challenged either with 1 X 10<sup>2</sup>, 1 X 10<sup>3</sup> or 1 X 10<sup>4</sup> spores and the LD<sub>50</sub> was determined using the Reed-Muench method using the higher dose at day five.

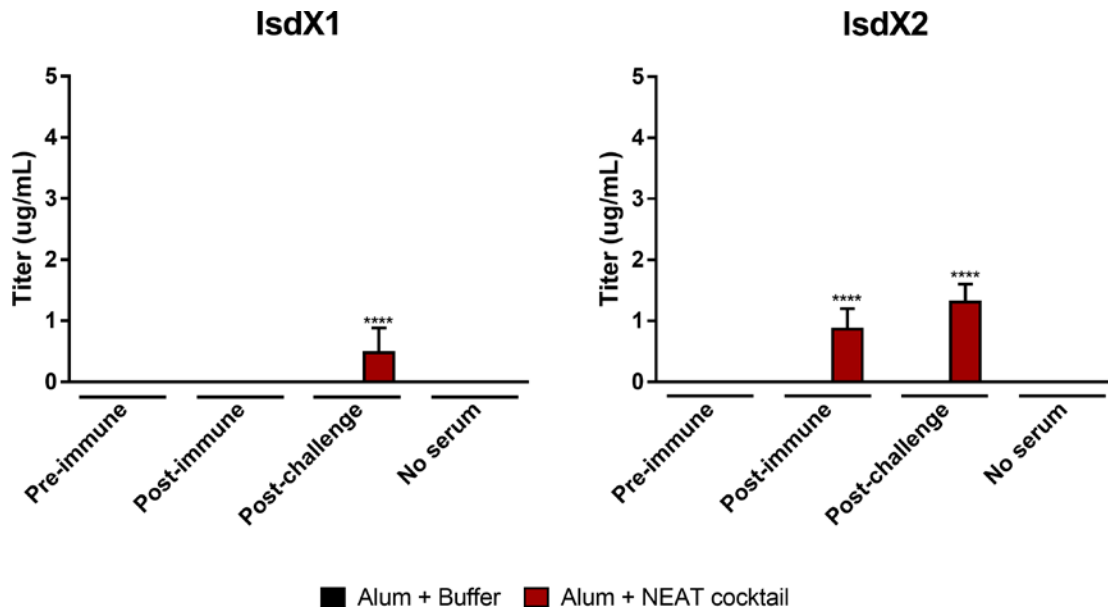

**Supplementary Figure 2. Reactivity of the serum from mice vaccinated with the NEAT domains and Alum.** Pre-immune, post-vaccine and post-challenge serum from mice vaccinated either with Alum, Hal<sub>N</sub>, or the NEAT cocktail were evaluated for the presence of anti-NEAT antibodies using ELISA with purified NEAT domains from each NEAT protein: IsdX1, Hal, BslK, IsdC and IsdX2. The asterisks represent Tukey's multiple comparison test comparing the post-immune or post-challenge response to the pre-immune and no-serum response; \*\*\*\* p < 0.0001
